# Supplementary material for: Dynamics of a network mediated by IL-36 and involved in the pathogenesis of psoriasis
Source: Frontiers journal article supplement (doi:10.3389/fnetp.2024.1363791), 2024-05-31
Supplement: Data_Sheet_1.PDF [file Data_Sheet_1.PDF]

## Supporting Information

### Dynamics of the Network Mediated by IL-36 in the Pathogenesis of Psoriasis

Sneha Pandey<sup>1,\*</sup>, Syona Tiwari<sup>1,\*</sup>, Sulagna Basu<sup>1,\*</sup>, Rajiv Kumar Mishra<sup>2</sup>, and Rakesh Pandey<sup>1,++</sup>

<sup>1</sup> Bioinformatics, MMV, Banaras Hindu University, Varanasi, Uttar Pradesh, India

<sup>2</sup> iOligos Technologies Private Limited, India

\*Contributed equally

++ Correspondance: [rakeshpandey@bhu.ac.in](mailto:rakeshpandey@bhu.ac.in)

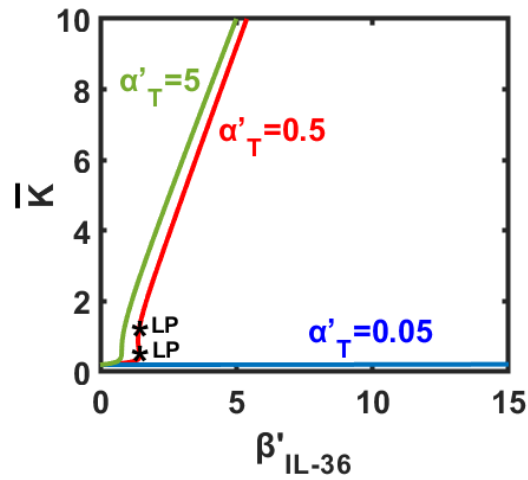

**Figure 1:** Keratinocytes vs.  $\beta'_{IL36}$ : Comparative graph for varying levels of Effective rates of migration of T- cells towards psoriatic lesion.
